## Non-random mating and information theory

A. Carvajal-Rodríguez

Departamento de Bioquímica, Genética e Inmunología. Universidad de Vigo, 36310  
Vigo, Spain.

\*: A. Carvajal-Rodríguez. Departamento de Bioquímica, Genética e Inmunología.

Universidad de Vigo, 36310 Vigo, Spain. Phone: +34 986813828

*email: [acraaj@uvigo.es](mailto:acraaj@uvigo.es)*

**Keywords:** Mate choice, sexual selection, sexual isolation, Price equation, Kullback-Leibler divergence, population genetics.

## *Abstract*

1 In this work, mate choice is modeled by means of the abstract concept of mutual mating  
2 propensity. This only assumes that different type of couples can have different mating  
3 success. The model is adequate for any population where mating occurs among distinct  
4 types. There is no extra assumption about particular mating scheme or preference  
5 model. The concept of mutual mating propensity permits to express the observed  
6 change in the mating phenotypes as the gain in information with respect to random  
7 mating. The obtained expression is a form of the Price equation in which the mapping  
8 between ancestral and descendant population is substituted by a mapping between  
9 random mating and non random mating population.

10 At the same time, this framework provides the connection between mate choice and the  
11 exact mathematical partition of the choice effects, namely sexual isolation, sexual  
12 selection and a mixed effect. The sexual selection component is the sum of the intra-  
13 sexual male and female selection.

14 The proposed framework helps to unveil previously hidden invariants. For example, if  
15 the mutual preference between partner types is multiplicative there is no sexual isolation  
16 (inter-sexual selection) effect on the frequencies, i.e. the only possible effect of mate  
17 choice is intra-sexual selection. On the contrary, whatever the contribution of each  
18 partner to the mutual preference, if it comes as a non-multiplicative factor, there is at  
19 least an inter-sexual selection detectable effect.

20 This new view over the mate choice problem, permits to develop general mating  
21 propensity models and to make predictions of the mate choice effects that may emerge  
22 from such models. This possibility opens up the way for setting a general theory of  
23 model fitting and multimodel inference for mate choice.

24 Thus, it is suggested that the proposed framework, by describing mate choice as the  
25 flow of information due to non-random mating, provides a new important setting for  
26 exploring different mating models and their consequences.

27

## 28 **1. Introduction**

29 Mate choice is arguably one of the most active areas of evolutionary research. There has  
30 been a lot controversy regarding the concept of mate choice. The debate around mate  
31 choice was due in part to its importance for fields so diverse as population genetics,  
32 evolutionary-ecology, animal behavior, sociology, or psychology. In addition, there has  
33 been an excess of verbal models and imprecise terminology regarding different aspects  
34 of mate choice (Edward, 2015). Mate choice can be broadly described as the effect of  
35 some expressed traits leading to non-random mating. Under this broad definition there  
36 are various aspects that can be considered. Yet Darwin (1871) distinguishes between  
37 intrasexual selection and intersexual selection. The first arises directly from competition  
38 among individuals of the same sex while the second arises from choice of mates by the  
39 other sex (Kuijper et al., 2012). Alternatively, from a population genetics point of view,  
40 mate choice is defined as the observed mating frequency deviation with respect to  
41 random mating, considering population gene or phenotype frequencies. So defined,  
42 mate choice can be partitioned into (intra)sexual selection, defined as the observed  
43 change in gene or phenotype frequencies in mated individuals with respect to  
44 population frequencies, and sexual isolation (behavioral isolation or intersexual  
45 selection), defined as the deviation from random mating in mated individuals (Rolán-  
46 Alvarez and Caballero, 2000). In this work I followed these definitions of mate choice,  
47 intrasexual and intersexual selection.

48 For an alternative description of these concepts and a discussion about some of the most  
49 widely used descriptions of evolutionary change within the context of sexual selection, I  
50 refer the reader to (Kuijper et al., 2012; Rosenthal, 2017).

51 The many aspects and complexity of mate choice justifies the extensive research that  
52 has been made in the last decades producing several theoretical models and empirical  
53 tests. Related to modeling and detection of mate choice, there is the question about the  
54 correct null hypothesis for testing the evolution of mate choice. The Lande-Kirpatrick  
55 (L-K) model has been proposed as a null model (Kirkpatrick, 1982; Lande, 1981; Prum,  
56 2010; Roff and Fairbairn, 2014). This model assumes neutral genetic variation for the  
57 mating preference trait while the target trait can be under natural selection. However,  
58 the L-K role as a null model is not clear when the preference is set by similarity  
59 (preference and target trait coincide) and the trait is under divergent selection (Servedio  
60 et al., 2011), i.e. the trait is "magic" sensu Gavrillets (2004), because in this case the  
61 preference trait is already under selection (Hughes, 2015).

62 Therefore, there is still a need for both, null models and a general framework, where the  
63 key essential facts of the mate choice can be adequately described. Here, I argue that the  
64 formalism provided by the information theory in the form of the Jeffreys' divergence is  
65 the right tool to do so.

66 The information theory has already been elegantly applied for describing evolutionary  
67 change (Frank, 2009; Frank, 2012b; Frank, 2013). The present work takes advantage of  
68 that mathematical structure and applies it for modeling the change in mating frequencies  
69 due to mate choice. As far as I know there is no previous attempt of describing mate  
70 choice from the viewpoint of the information theory. Nevertheless, the potential of the  
71 informational view for evolutionary ecology has been already suggested (Dall et al.,  
72 2005).

73 First, I defined a general model that only requires an abstract functional relationship  
74 connecting the observed mating frequencies with the expected by random mating from

75 the population gene or phenotype frequencies. This suffices for developing a general  
76 information equation for mate choice that can be adequately partitioned into intrasexual  
77 and intersexual information components, plus a mixed term provoked by the  
78 confounding effect of the marginal frequencies when the mating propensity effects are  
79 asymmetric. Interestingly, the three terms can be separately estimated from the observed  
80 frequencies and so, the researcher can study how different models and parameters  
81 translate into the different mate choice components. Also, it is proposed that this setting  
82 provides the baseline for solving the mate choice null hypothesis problem, since the null  
83 model emerges naturally from the idea of zero information. Thus, the correct null  
84 should not rely on neutral preference or trait genes but on zero information.

85 The utility of this framework is shown by analyzing a real data example. I will show  
86 how the view obtained from the unveiled relationships can be utilized to classify  
87 different general models from its consequences which facilitates the multimodel  
88 inference of the mate choice. However, a deeper study on the outcomes of different  
89 forms of the mating preference functions is out of the scope of the present article and is  
90 part of a different paper.

91

## 92 **2. Model of Mate Choice**

93 As mentioned above, the following model is as a particular specification of the  
94 information theory interpretation for evolutionary models, proposed in (Frank, 2012b;  
95 Frank, 2013). The general framework developed by this author fits perfectly for the  
96 purpose of describing the occurrence of non-random mating and the flow of information  
97 that it provokes. Remarkably, once the basic equation for the gain in information due to  
98 non-random mating is formalized, the relationship between mate choice and its different

99 evolutionary outcomes emerges naturally, providing a clear and useful picture of the  
100 intrasexual and intersexual selection effects.

101

## 102 *2.1 General model*

103 Let consider a population with a number of  $n_1$  females and  $n_2$  males. For a given female  
104 phenotype  $X$  (e.g. shell color) with  $K$  different classes having values  $X_1, X_2 \dots X_k$ , the  
105 frequency of the phenotype  $X_i$  in the female population is  $p_{1i} = n_{1X_i} / n_1$ , i.e. the number  
106 of females with that phenotypic value divided by the total number of females. Similarly,  
107 for the male phenotype  $Y$  (could be the same as  $X$ ) with  $K'$  classes, the frequency of  $Y_j$  in  
108 the male population is  $p_{2j} = n_{2Y_j} / n_2$ .

109 In this way, by using the frequency of the phenotype for each sex, the expected mating  
110 frequencies if mating is at random is

$$111 \quad q_{ij} = p_{1i} \times p_{2j}.$$

112 Now, given a female phenotype  $X_i$  and a male phenotype  $Y_j$ , let's define the mutual  
113 mating propensity  $m_{ij}(x, y, e)$  as the number of matings of  $X_i$  with  $Y_j$  after their  
114 encounter in the environment  $e$ . The normalized mating propensity is

$$115 \quad m_{ij}(x, y, e) / M$$

116 where  $M = \sum_{i,j} q_{ij} m_{ij}(x, y, e)$ .

117 Then, the observed mating frequencies in a given environment  $e$  can be expressed as

$$118 \quad q'_{ij} = q_{ij} \frac{m_{ij}(x, y, e)}{M} \quad (1)$$

119 Therefore, the observed mating frequencies are the result of the functions  $m_{ij}(x,y,e)$   
120 (hereafter noted as  $m_{ij}$ ), that can be any kind of composition of the preference of female  
121  $X_i$  for male  $Y_j$ , and vice versa, in the environment  $e$ .

122 Note that random mating is a particular case of the model in (1) when the propensities  
123 are equal for every mating pair. The mutual mating propensity functions can represent  
124 empirical or analytical functions, as for example the Gaussian-like preference functions  
125 (reviewed in Carvajal-Rodriguez and Rolán-Alvarez, 2014). Moreover, each  $m_{ij}$  can be  
126 composed of female and male preferences, so mutual mate choice models (Bergstrom  
127 and Real, 2000) are also available under this setting. The standardized  $m_{ij}$  values could  
128 also be estimated a posteriori from the data. In this case they coincide with the pair total  
129 index i.e. the ratio of the frequency of the observed types divided by the expected pair  
130 types calculated from the total frequencies ( $PTI_{ij} = q'_{ij}/q_{ij}$ , Rolán-Alvarez and Caballero,  
131 2000) which becomes an observation of the mutual mating propensity from the mating  
132 phenotypes (see below).

133 Once we have the mating frequencies as defined in (1), the change with respect to  
134 random mating is

$$135 \quad \Delta q_{ij} = q'_{ij} - q_{ij} = q_{ij} \left( \frac{m_{ij}}{M} - 1 \right)$$

136 The mean population change for a combined phenotype  $Z = X * Y$  is

$$\Delta Z = \sum_{i,j} \Delta q_{ij} Z_{ij}$$

137 Because the relationship in (1) is defined by ratios is more natural to express the  
138 quantities in the logarithmic scale and so we can express  $m_{ij}$  as



139 
$$m_{ij} = M \frac{q'_{ij}}{q_{ij}}$$

140 which in the logarithmic scale becomes

141 
$$l_{ij} = \log(m_{ij}) = \log(M) + \log\left(\frac{q'_{ij}}{q_{ij}}\right)$$

142 Thus, if we take the logarithm of the propensity as the combined phenotype  $Z$  and by  
143 noting that  $\sum \Delta q_{ij} = 0$  and that  $\log(M)$  is constant through the summation, then we can  
144 measure the mean population change  $\Delta L$  in relative propensity as

145 
$$\Delta L = \sum_{i,j} \Delta q_{ij} l_{ij} = \sum_{i,j} \Delta q_{ij} \log\left(\frac{q'_{ij}}{q_{ij}}\right) = J(q', q) \equiv J_{PTI} \quad (2)$$

146 which is the Kullback-Leibler symmetrized divergence (noted as Jeffreys in Frank,  
147 2012b), that measures the gain in information when the differential mating propensity  
148 moves the population from mating frequencies  $q$  to  $q'$  or vice versa. Note that if the  
149 propensity is equal for every pair i.e.  $M = m_{ij} \forall i,j$  then  $q' = q$  so that  $J = 0$  which is the  
150 minimum information value since  $J$  cannot be negative.

151 Recall from equation (1), that each  $m_{ij}/M$  is the ratio of the frequency of the observed  
152 types divided by the expected pair types from the total frequencies. This is, by  
153 definition, the pair total index  $PTI$  (Rolán-Alvarez and Caballero, 2000) and so, the  
154 logarithmic term in  $\Delta L$  is the logarithm of the  $PTI$  values. Therefore,  $J(q', q)$  measures  
155 the gain in information as captured by the  $PTI$  coefficients, confronting the hypothesis  
156 of mate choice against random mating. Hereafter, we note this  $J$  as  $J_{PTI}$ .

157 Interestingly enough, the Jeffreys' divergence computed as  $J_{PTI}$  (by taking the natural  
158 logarithm and multiplying (2) by the total number of matings) is well approximated by a

159 chi-square for the null hypothesis of random mating with  $KK'-1$  degrees of freedom  
160 (Evren and Tuna, 2012).

161 The information obtained from  $J_{PTI}$  has been computed using the different propensities  
162 as classes for classifying the couples i.e. we considered  $\log(m)$  as the phenotype  $Z$ .  
163 When the classes are based upon other phenotypes rather than propensities, we are  
164 conveying a specific meaning for the change in frequencies, say, the change in mating  
165 frequencies due to differential mutual propensities is observed in terms of change in  
166 shell color mating frequencies. Therefore, the phenotype can be viewed as other scale  
167 on which we can measure this information (Frank, 2013). Of course, different kinds of  
168 phenotypes can be more or less involved in mate choice and so, different scales are  
169 more or less useful for measuring the mate choice information.

170

## 171 *2.2 Relative propensity and phenotypes*

172 When we observe any mating pair  $(i,j)$ , we need to identify the mating by a given  
173 characteristic (e.g. shell color) since we cannot directly classify it by the value of the  
174 propensity function  $m_{ij}$ . In general, we ignore the specific form of the mutual mating  
175 propensity function  $m$  and so, we may assume that some phenotype matches it perfectly,  
176 as we did above (each phenotypic pair was perfectly differentiated by specific  $m_{ij}$   
177 mating propensity).

178 Thus, if  $T$  is the trait that is the target of the choice, we call  $J_{PTI}$  to the change in the  
179 numbers of matings when these matings were classified by  $T$ .

180

181 Therefore, we may think on different traits  $Z$  that classify the mating pairs;  $Z$  can be a  
182 composition of female trait  $X$ , e.g. preference, and male target  $Y$ , or can be any kind of  
183 different traits or alternatively the same trait in both sexes as size, age or color. In any  
184 case, we measure the mean change in  $Z$  caused by differences in  $m$ , as

$$185 \quad \Delta_m Z = \sum_{\alpha, \beta} \Delta q_{\alpha\beta} Z_{\alpha\beta} = \sum_{\alpha, \beta} q_{\alpha\beta} (m_{\alpha\beta} - M_z) \frac{Z_{\alpha\beta}}{M_z} = \frac{\text{cov}(Z, m_z)}{M_z} \quad (3)$$

186 Where  $\text{cov}$  is the population covariance in the sense of Price (1972) as highlighted in  
187 Frank (2012a). The subscripts  $\alpha, \beta$  emphasize that we are looking at pairs with observed  
188 phenotypes that not necessarily are the phenotypes exactly connected with the choice.  
189 Therefore, the propensities for the matings classified under these phenotypes can be  
190 different to the propensities for the trait  $T$ , then we note  $m_z$  and  $M_z$  to distinguish from  
191 the propensities ( $m$ ) and mean propensity ( $M$ ) measured directly from the real choice  
192 trait.

193 Equation (3) is in fact, a form of the Price equation with a different mapping for the  
194 populations involved. While the Price equation (Frank, 2012a; Price, 1972) describes  
195 the change in phenotype between two connected ancestor and descendant populations;  
196 in our equation (3), the mapping is between the random mating population and the one  
197 obtained under a given mutual mating propensity scheme.

198 The variable  $Z$  can be any desired trait including, as we assumed above, the logarithm of  
199 the propensities. So, if we take  $Z$  equal to the logarithm of  $m$ , then by substituting in (3)  
200 we obtain the mean population change  $\Delta L_z$  as

$$201 \quad \Delta L_z = \text{cov}(m_z, l_z) / M_z$$

202 where the subscript  $z$  indicates that the propensities are now indexed by the trait  $Z$ .

203 Recalling the relationship in (2), we now define

$$204 \quad JZ_{PTI} \equiv \Delta L_z = cov(m_z, l_z) / M_z = \alpha_z J_{PTI}$$

205 where if  $J_{PTI} > 0$

$$206 \quad \alpha_z = (\beta(m_z, l_z) \times D_z) / (\beta(m, l) \times D)$$

207 with  $l_z = \log(m_z)$ ,  $D_z = V(m_z)/M_z$ ,  $l = \log(m)$  and  $D = V(m) / M$

208 or  $\alpha_z = 1$  if  $J_{PTI} = 0$ .

209 Note that  $D$  and  $D_z$  are the indexes of dispersion over the choice and  $Z$  traits

210 respectively, so  $\alpha_z$  is the quotient of the regressions multiplied by the index of

211 dispersion at each phenotypic scale.

212 From the point of view of the estimation with real data, if we cannot measure directly

213 the values of  $m$  then we simply compute  $J$  based on trait  $Z$  and therefore we are really

214 computing  $JZ_{PTI}$ .

215 In this case, note that the  $PTI$  coefficients are no longer the exact estimate of the mutual

216 mating propensities because the ratio of frequencies  $q'_{\alpha\beta}/q_{\alpha\beta}$  does not correspond to

217  $m_{ij}/M$  but to  $m_{\alpha\beta}/M_z$  which is a proxy that would be more or less precise depending on

218 the importance of the measured phenotype over the mating choice. For example, if shell

219 size is driving mate choice, the measure of  $JZ_{PTI}$  ( $Z =$  shell size) would correspond well

220 with  $J_{PTI}$  ( $J_{PTI} > 0$ ;  $\alpha_z \approx 1$ ). However, if other phenotype as shell color has nothing to do

221 with mate choice (and is not correlated with shell size) then the measure of  $JZ_{PTI}$  ( $Z =$

222 shell color) would be zero ( $J_{PTI} > 0$ ;  $\alpha_z = 0$ ). Further details about the distinction

223 between  $JZ_{PTI}$  and  $J_{PTI}$  are given in appendix A.

224 The mate choice mediated by the differences in mutual mating propensity would  
225 produce a deviation from random mating. At the same time, this may cause two  
226 different effects, namely, intrasexual selection and intersexual selection, hereafter noted  
227 as sexual selection and sexual isolation, respectively.

228

### 229 2.3. Sexual selection

230 Sexual selection is defined as the observed change in gene or phenotype frequencies in  
231 mated individuals with respect to total population frequencies (Rolán-Alvarez and  
232 Caballero, 2000). This change can be studied using the frequencies within each sex, or  
233 considering jointly both sexes, by using the pair sexual selection coefficient (*PSS*,  
234 Rolán-Alvarez and Caballero, 2000). I will show that, when the *PSS* coefficients are  
235 considered a priori as the marginal propensities for the mating types, the information  
236 gained due to sexual selection is the sum of the information from each sex. When the  
237 focus is on the phenotypes instead on the propensities, the partition continue to be true,  
238 provided that the same phenotypic scale is applied when computing the *PSS* coefficients  
239 and the intrasexual components.

240 From the general model, the population frequency of the female phenotype  $X_i$  is  $p_{1i}$ . The  
241 observed frequency of  $X_i$  in mated individuals,  $p'_{1i}$ , is computed as the sum of the  
242 mating frequencies involving a female  $X_i$

$$243 \quad p'_{1i} = \sum_j^{males} q'_{ij} = p_{1i} \sum_j p_{2j} \frac{m_{ij}}{M} = p_{1i} \frac{m'_{fi}}{M}$$

244 where  $m'_{fi}$  is the marginal mating propensity for the female type  $i$ .

245 Similarly for males, the frequency of phenotype  $Y_j$  is  $p_{2j}$  and the frequency for the male  
 246 type  $j$  in mated individuals is

$$247 \quad p'_{2j} = p_{2j} \frac{m'_{mj}}{M}$$

248 where  $m'_{mj}$  is the marginal mating propensity for the male type  $j$ .

249 The mean change in information due to sexual selection within each sex is, in terms of  
 250 the female marginal propensity (female intrasexual selection)

$$251 \quad \Delta_m L_x = \sum_i^{females} \Delta p_{1i} X_i = \sum_{ij} p_i (m'_{fi} - M) \frac{X_i}{M} = J(p'_1, p_1) \equiv J_{S1}$$

252 and, in terms of male marginal propensity (male intrasexual selection)

$$253 \quad \Delta_m L_y = \sum_j^{males} \Delta p_{2j} Y_j = J(p'_2, p_2) \equiv J_{S2}$$

254 The term  $J_S$  has been obtained in a similar way as for the general case, i.e. by expressing  
 255 each marginal  $m'_{fi}$  and  $m'_{mj}$  in function of their respective ratio of frequencies multiplied  
 256 by the mean propensity  $M$  and substituting the phenotype  $X$  or  $Y$ , by the logarithm of the  
 257 corresponding (female or male) marginal  $m'$ .

258 The change to the scale of phenotypes produces

$$259 \quad \Delta_m \bar{X} = \alpha_x J_{S1} \equiv JX_{S1}$$

260 with

$$261 \quad \alpha_x = [\beta(m'_{xf}, l_{xf}) \times D_{xf}] / [\beta(m'_f, l_f) \times D_f] \text{ or } 1 \text{ if } J_{PS1} = 0$$

262 where  $l_{xf} = \log(m'_{xf})$ ,  $D_{xf} = V(m'_{xf})/M_z$ ,  $l_f = \log(m'_f)$ ,  $D_f = V(m'_f)/M$ .

263 And

$$264 \quad \Delta_m \bar{Y} = \alpha_y J_{S2} \equiv JY_{S2}$$

265 
$$\alpha_y = [\beta(m'_{ym}, l_{ym}) \times D_{ym}] / [\beta(m'_m, l_m) \times D_m] \text{ or } 1 \text{ if } J_{PS2} = 0$$

266 where  $l_{ym} = \log(m'_{ym})$ ,  $D_{ym} = V(m'_{ym})/M_z$ .

267 Note that the subscripts  $x$  (females) or  $y$  (males) refer to the matings classified by  
 268 phenotype instead of the true choice trait, also note that the mean of both female and  
 269 male marginals is the same and equal to the mean propensity ( $M_z$  or  $M$  depending on the  
 270 scale).

271  $JX_{S1}$  and  $JY_{S2}$  are the Jeffrey's divergence that expresses the gain of information due to  
 272 intrasexual selection measured on the combined phenotypic scale  $Z$ .

273 *2.4. Pair sexual selection*

274 In addition to the computation within each sex, we can compare the expected pair types  
 275 under random mating calculated in mated individuals, with the expected pair types from  
 276 total numbers ( $PSS$ , see above). Thus,  $PSS_{ij} = (p'_{1i}p'_{2j}) / (p_{1i}p_{2j}) = m'_{fi}m'_{mj} / M^2$ . The latter  
 277 term can be viewed as an a priori expression of the  $PSS$  coefficients. Again, the  
 278 difference between the observed and the expected distribution can be expressed as

279 
$$\Delta_{PSS}L = \sum_{i,j} \Delta(p_{1i}p_{2j}) \log \left( \frac{p'_{1i}p'_{2j}}{p_{1i}p_{2j}} \right) = J(p'_1p'_2, p_1p_2) \equiv J_{PSS},$$

280 where  $\Delta(p_{1i}p_{2j}) = p'_{1i}p'_{2j} - p_{1i}p_{2j}$ .

281 In the scale of phenotypes

282 
$$\Delta_{PSS}L_z = \alpha_{pss} J_{PSS} \equiv JZ_{PSS}$$

283 with

284 
$$\alpha_{pss} = (\beta(m'_z, l'_z) \times D'_z) / (\beta(m', l') \times D') \text{ or } 1 \text{ if } J_{PSS} = 0$$

285 where  $m'_z = m'_{xf} \times m'_{ym}$ ,  $m' = m'_f \times m'_m$ ,  $D'_z = V(m'_z)/M^2_z$ ,  $l'_z = \log(m'_z)$ ,  $l' = \log(m')$ ,  $D'$   
286  $= V(m')/M^2_z$ .

287 The change in the phenotype due to sexual selection is driven by the aprioristic version  
288 of *PSS*, and is expressed in term of the information accumulated and rescaled from the  
289 marginal propensities to *Z*.

290 The relationship between sexual selection measured within sex and the pair sexual  
291 selection measured by *PSS* is (details in Appendix B)

$$292 \quad J_{PSS} = J_{S1} + J_{S2}$$

293 And in the scale of phenotypes

$$294 \quad JZ_{PSS} = JX_{S1} + JY_{S2} \quad (4)$$

295 provided that the same phenotypic scale applies in the pair sexual selection statistic and  
296 in the intrasexual components (i.e. the criteria utilized for classifying the different  
297 couples is the same).

298 The information captured in the *PSS* coefficients is the sum of the sexual selection  
299 within each sex.

300

### 301 2.5. Sexual isolation

302 Sexual isolation is defined as the deviation from random mating in mated individuals  
303 (Rolán-Alvarez and Caballero, 2000). The pair sexual isolation statistic (*PSI*) is the  
304 number of observed pair types divided by the expected pair types from mates. In terms  
305 of our model this is the ratio of frequencies



$$306 \quad PSI_{ij} = q'_{ij}/(p'_{1i}p'_{2j}) = (m_{ij}/M) / (m'_{fi}m'_{mj}/M^2) \equiv \delta_{ij} \quad (5)$$

307 The term  $\delta$  refers to an aprioristic (depends on the  $m$ 's from the model) definition of the  
 308  $PSI$ s. The joint isolation index for  $PSI$  can be expressed as

$$309 \quad I_{PSI} = \frac{(k-1)\sum_i \delta_{ii} - \sum_{ij} \delta_{ij}}{(k-1)\sum_i \delta_{ii} + \sum_{ij} \delta_{ij}}$$

310 where  $k$  is the number of phenotypic classes involved in the classification of the matings  
 311 (Carvajal-Rodriguez and Rolan-Alvarez, 2006).

312 As with the previous pairwise statistics, we may obtain the equations of change between  
 313 observed and expected pair types in terms of  $J$ .

$$314 \quad \Delta_{PSI}L = \sum_{i,j} \Delta(p'_{1i}p'_{2j}) \log \left( \frac{q'_{ij}}{p'_{1i}p'_{2j}} \right) = J(q', p'_1 p'_2) \equiv J_{PSI},$$

315 where  $\Delta(p'_{1i}p'_{2j}) = q'_{ij} - p'_{1i}p'_{2j}$ .

316 In the scale of phenotypes

$$317 \quad \Delta_{PSI}L_z = \alpha_\delta J_{PSI} \equiv JZ_{PSI}.$$

318 The scaling factor  $\alpha_\delta$  is not always easy to compute. Provided that there is no sexual  
 319 selection ( $J_{PSS} = 0$ ) then  $\alpha_\delta = \alpha_z$  and so  $JZ_{PTI} = JZ_{PSI} = \alpha_z J_{PSI}$ . Otherwise we need to  
 320 rescale the factor  $E_0$  (see below) to finally get the transformation between  $JZ_{PSI}$  and  $J_{PSI}$   
 321 (see Appendix C).

322 The  $JZ_{PSI}$  index provides the correct metric to express the part of change in mating  
 323 information that translates into sexual isolation. Presenting the  $PSI$ 's under this  
 324 formalism allow us to appreciate some facts that are not obvious from the a posteriori  
 325 definition of coefficients estimated from data. We must realize (see equation 5) that if  
 326 the normalized propensity of each pair ( $m_{ij}/M$ ) is the product of the normalized

327 marginal types of each partner then  $\delta = 1$  and so, both, the values of  $I_{PSI}$  and  $J_{PSI}$  are  
328 zero indicating no sexual isolation at all. Thus, in any model in which the mutual mating  
329 propensity is multiplicative, the only possible outcome from mate choice is intrasexual  
330 selection.

331 We can illustrate the multiplicative effect by means of a simple model based on a real  
332 species scenario. The bird sage grouse (*Centrocercus urophasianus*) has elaborate  
333 courtship rituals. In the spring season, males congregate in leks that are visited by the  
334 females that actively choose one of the males for mating. The number of females  
335 visiting a male seems to be related with the male long-range acoustic broadcasts  
336 whereas the probability of mating once visited is related to the visual display (Gibson,  
337 1996).

338 It has been suggested that both traits, acoustic broadcast and display rate, yield a  
339 multiplicative preference for males with specific acoustic conditions and high display  
340 rates (Gibson, 1996; Rosenthal, 2017).

341 Thus, we can define a model of the multiplicative effect of the aforementioned traits  
342 (see details in Appendix D). Obviously, the real mating scenario is by far more  
343 complex, but the example suffices to illustrate the point.

344 The females are the choosers and so our model assumes a single female phenotypic  
345 class ( $X$ ) and two male traits with two phenotypic classes each,  $B/b$  for acoustic  
346 broadcast, and  $D/d$  for display rate, where in both cases the upper case refers to the  
347 higher value of the trait. We define a multiplicative preference effect for acoustic  
348 broadcast and display rate, so that the female propensity for males  $BD$  can be expressed  
349 as the product of the female propensities for  $Bd$  and  $dB$ , i.e.  $m_{XBD} = m_{XBd} \times m_{XbD}$   
350 (supplementary Table S1).

351 Under this model, the mean propensity  $M$  coincides with the female marginal,  $m'_{fX} = M$ .

352 The four male marginal propensities ( $m'_{mBd}$ ,  $m'_{mBD}$ ,  $m'_{mbD}$ ,  $m'_{mbd}$ ) have the same values

353 as their corresponding mutual propensities ( $m_{XBd} = \alpha$ ,  $m_{XBD} = \alpha\beta$ ,  $m_{XbD} = \beta$ ,  $m_{Xbd} = 1$ ; see

354 Appendix D).

355 The model is multiplicative since each normalized mutual propensity is equal to the

356 product of the normalized marginals, e.g.  $m_{XBd}/M = (m'_{fX}/M) \times (m'_{mBd}/M)$ .

357 By computing the aprioristic expressions in (5), we see that  $\delta_{Bd} = \delta_{BD} = \delta_{bD} = \delta_{bd} = 1$ .

358 Thus, provided that the mating reflects the propensities, the result is that independently

359 of the phenotypes, the number of observed pair types would be equal to the expected

360 pair types from mates, which means that there is no sexual isolation.

361 On the other hand, the model predicts male sexual selection whenever  $m_{XBd}$  and/or  $m_{XbD}$

362  $\neq 1$ .

363

### 364 **3. Relationship between Mate Choice, Sexual Selection and Sexual Isolation**

365 The information as captured by the *PTI* coefficients can be partitioned in terms of *PSS*

366 and *PSI*. Recall the expression (2) for  $J_{PTI}$

367 
$$\Delta L = \sum_{i,j} \Delta q_{ij} \log \left( \frac{q'_{ij}}{q_{ij}} \right) = J(q', q) \equiv J_{PTI}$$

368 The term  $\Delta q_{ij}$  can be expressed as the sum of the frequency changes for sexual selection

369 and isolation

370 
$$\Delta q_{ij} = \Delta(p_{1i}p_{2j}) + \Delta(p'_{1i}p'_{2j})$$

371 The logarithmic term  $\log(q'_{ij}/q_{ij})$  which we have also noted as  $\log(PTI)$  is also  
 372 partitioned in the sexual selection and isolation components

$$373 \quad \log(PTI) = \log(PSS) + \log(PSI).$$

374 Therefore

$$375 \quad J_{PTI} = \sum_{ij} ([\Delta(p_{1i}p_{2j}) + \Delta(p'_{1i}p'_{2j})] \times [\log(PSS_{ij}) + \log(PSI_{ij})]) \text{ i.e.}$$

$$376 \quad J_{PTI} = J_{PSS} + J_{PSI} + E_0$$

377 where  $E_0 = \sum_{ij} (\Delta(p_{1i}p_{2j})\log(PSI_{ij}) + \Delta(p'_{1i}p'_{2j})\log(PSS_{ij}))$ . However, note that

378  $\Delta(p'_{1i}p'_{2j})\log(PSS_{ij}) = 0$  (see Appendix E) so finally

$$379 \quad E_0 = \sum_{ij} (\Delta(p_{1i}p_{2j})\log(PSI_{ij}) = \text{cov}(m'_m, \log(PSI)) / M^2$$

380 thus  $E_0$  is proportional to the covariance between the marginal propensities and the  
 381 logarithm of the  $PSIs$ .

382 The covariance expression is useful for defining a scaling factor (see Appendix C) i.e.

$$383 \quad \alpha_E = \beta(m'_z, l_{zpsi}) \times D'_z / \beta(m', l_{psi}) \times D' \text{ or } 1 \text{ if } E_0 = 0$$

384 where  $l_{zpsi} = \log(PSI_z)$ ,  $l_{psi} = \log(PSI)$  and  $m'_z$ ,  $m'$ ,  $D'_z$  and  $D'$  are the same as defined for

385  $\alpha_{pss}$ . The subscript in  $PSI_z$  indicates that this is the value obtained under trait  $Z$  contrary

386 to  $PSI$  which is obtained directly under the choice trait.

387 Then,  $\alpha_E$  permits to interchange between the scale of phenotypes and choice so,  $ZE_0 =$

388  $\alpha_E E_0$ .

389 Alternatively, we can also express  $E_0$  (see Appendix E for details) as

$$390 \quad E_0 = D'_{KL}(w, q' || p')$$

391 which is a Kullback–Leibler-like divergence with weights  $w_{ij} = (PSS_{ij} - 1) / PTI_{ij}$  in the  
392 observations  $q'$ . Note that contrary to the standard K-L divergence,  $E_0$  can be negative  
393 depending on the weights.

394 The total information is separated into the sexual selection ( $J_{PSS}$ ) and isolation ( $J_{PSI}$ )  
395 components plus the mixed term  $E_0$ . Note that  $E_0$  appears only when both sexual  
396 selection and sexual isolation effects occur so that the above given covariance is not  
397 null.

398 If  $E_0 = 0$  this means that  $J_{PSS}$  and/or  $J_{PSI}$  capture the complete information from mate  
399 choice. When  $E_0$  is positive it indicates that the information gathered from  $J_{PSS}$  and  $J_{PSI}$   
400 separately is not the total information from mating choice. On the other side, when  $E_0$  is  
401 negative there is some inverse relationship between sexual selection and sexual isolation  
402 information.

403 In the scale of phenotypes the partition still holds provided that the same phenotypic  
404 classification is applied when computing the different measures

$$405 \quad JZ_{PTI} = JZ_{PSS} + JZ_{PSI} + ZE_0 \quad (6)$$

406 where  $ZE_0$  is the value of  $E_0$  in the given phenotypic scale.

407 For any given logarithmic base, the amount of the total information,  $JZ_{PTI}$ , depends on  
408 the magnitude of the differences among the mutual mating propensity values linked to  
409 the population phenotypes under study. The higher the differences encountered the  
410 higher the value of  $JZ_{PTI}$ . Without loss of generality, from herein we consider the  
411 natural logarithm because this facilitates testing against the null hypothesis of no  
412 information by means of the chi-square distribution.

413 We have given formulae for the change in the phenotypic scale for every term in (6)  
414 except  $JZ_{PSI}$ . In this case, we have to predict the change in the scale by computing the  
415 remaining factors and solving for  $JZ_{PSI}$  (Appendix C).

416 If, as expected, the observations used to compute the information statistics come from  
417 the same sample, the sum in (6) is exact so it recovers the whole information gathered  
418 from mate choice. On the contrary, if the computations has been performed using  
419 different samples, it could be a remaining part of mate choice information that is non-  
420 explained by the above statistics but that can be recovered by the error term

$$421 \quad E_{PTI} = JZ_{PTI} - (JZ_{PSS} + JZ_{PSI} + ZE_0) \quad (7)$$

422 that reflects how much information may be lost due to differences in the measurement  
423 of the involved phenotypes when computing the different information components from  
424 separate samples.

425

#### 426 **4. Real Data Application**

427 The theoretical framework I have presented so far has been defined in a general way, for  
428 any number of male and female phenotypic classes, and for any kind of mutual mating  
429 propensities. The application of the  $J$  statistics to a data sample of dimorphic traits (two  
430 classes), is immediate. For clarity, I will use the same example that appears in the  
431 pairwise statistics ( $PTI$ ,  $PSI$  and  $PSS$ ) original article (Rolán-Alvarez and Caballero,  
432 2000). The correspondence between the pairwise statistics notation used by (Rolán-  
433 Alvarez and Caballero, 2000) and ours is as follows. The two phenotypic types are  
434 noted as  $A$  and  $B$ , the total number of observed matings is  $t$  and the number of  $A$  type  
435 females ( $A'$  in Rolán-Alvarez and Caballero, 2000) becomes, under our notation,  $p_{1A}n_1$ ,

436 and so  $B'$  is  $p_{1B}n_1$ ; the number of  $A$  males becomes  $p_{2A}n_2$  and  $B$  males are  $p_{2B}n_2$ . The  
 437 observed absolute number for each pair  $(i, j)$  would be  $q'_{ij}t$  with  $i, j \in \{A, B\}$  (see Table  
 438 1). The total number of expected mating pairs from population frequencies is  $n_1n_2$   
 439 corresponding to the quantity  $S$  in (Rolán-Alvarez and Caballero, 2000).

440

441 **TABLE 1. The mating model for two phenotypic classes identified as types  $A$  and**  
 442  **$B$ . The number of observed mating pairs is  $t$ .**

|         |             |             |            |            |
|---------|-------------|-------------|------------|------------|
| Females |             |             |            |            |
|         | $p_{1A}n_1$ | $p_{1B}n_1$ |            |            |
| Males   | $p_{2A}n_2$ | $q'_{AA}t$  | $q'_{BA}t$ | $p'_{2A}t$ |
|         | $p_{2B}n_2$ | $q'_{AB}t$  | $q'_{BB}t$ | $p'_{2B}t$ |
|         | $p'_{1A}t$  | $p'_{1B}t$  |            |            |
|         |             |             |            |            |

443  $p_{1i}$ : observed relative frequency of type  $i \in \{A, B\}$  in population females ;  $n_1$ : number of females in the  
 444 population;  $p_{2i}$ : observed relative frequency of type  $i \in \{A, B\}$  in population males ;  $n_2$ : number of males in  
 445 the population;  $p'_{1i}$ : observed relative frequency of type  $i$  in mating females;  $p'_{2i}$ : observed relative  
 446 frequency of type  $i$  in mating males;  $q'_{ij}$ : observed relative frequency of mating pair  $i, j$ .

447

448 The data correspond to a multiple-choice experiment involving two different lines of  
 449 *Drosophila melanogaster* so called  $M$ -like and  $Z$ -like (Hollocher et al., 1997). Rolán-  
 450 Alvarez & Caballero applied the pairwise statistics to this data and confirmed the  
 451 previous results from Hollocher *et al* indicating stronger sexual isolation than sexual  
 452 selection. They also suggested a fitness advantage of females versus males but they  
 453 were not able of distinguishing between female sexual selection and male preference for  
 454  $M$  females.

455 To perform the analysis, we expressed the observed data from that experiment in terms  
456 of the information model as presented in Table 1. In doing so, and noting that the  
457 observed number of mating pairs was  $t = 1704$ , we obtained the necessary quantities in  
458 terms of our model (Table 2).

459 The total mate choice information obtained in  $JZ_{PTI}$  is partitioned in 89% of sexual  
460 isolation ( $JZ_{PSI} / JZ_{PTI} = 0.468 / 0.526 = 0.89$ ;  $I_{PSI} = 0.63$ ), 6% of sexual selection and  
461 5% of mixed effects which explains the 100% of  $JZ_{PTI}$ . The information coming from  
462 sexual isolation is 14 times that from sexual selection, result that matches pretty well the  
463 outcome in (Rolán-Alvarez and Caballero, 2000).

464 The value of  $JZ_{PTI}$  multiplied by the number of matings can be approximated by a chi-  
465 square variable with 3 degrees of freedom under the expectation of  $JZ_{PTI} = 0$ , the  $p$ -  
466 value obtained was below 0.00001 which indicates non-random mating. The test against  
467  $JZ_{PSI} = 0$  with 1 degree of freedom, also had a  $p$ -value below 0.00001. The test against  
468  $JZ_{PSS} = 0$  was also below 0.0001. However, testing separately the female and male  
469 sexual selection cases (with one degree of freedom each) produced a  $p$ -value below  
470 0.0001 for the female case but a  $p$ -value of 0.77 for males.

471 Thus, we detected significant sexual isolation and selection effects as previously  
472 reported by (Rolán-Alvarez and Caballero, 2000). The sexual selection component is  
473 caused by a significant intrasexual effect in females. The mixed term  $E_0$  is positive thus  
474 indicating that not all the information is recovered by the  $PSS$  and  $PSI$  coefficients. This  
475 is due to the confounding effect which explains as far as the 5% from the total  
476 information.

477



478 **TABLE 2. Analysis using the mate choice information model (Table 1 and**  
 479 **equations 7) on *D. melanogaster* mating data from (Hollocher et al., 1997). The**  
 480 **number of observed copulating pairs is  $t = 1704$ .**

|                          |                   | Females Z            | Females M            |                      |
|--------------------------|-------------------|----------------------|----------------------|----------------------|
|                          |                   | $0.5 \times 1440$    | $0.5 \times 1440$    |                      |
| Males Z                  | $0.5 \times 1440$ | $0.3585 \times 1704$ | $0.145 \times 1704$  | $0.5035 \times 1704$ |
| Males M                  | $0.5 \times 1440$ | $0.051 \times 1704$  | $0.4455 \times 1704$ | $0.4965 \times 1704$ |
|                          |                   | $0.4095 \times 1704$ | $0.5905 \times 1704$ |                      |
| $JZ_{PTI}$               | 0.526             |                      |                      |                      |
| $JZ_{PSI}$ ( $I_{PSI}$ ) | 0.468 (0.63)      |                      |                      |                      |
| $JX_{S1} + JY_{S2}$      | $0.033 + 0.00005$ |                      |                      |                      |
| $ZE_0$                   | 0.024             |                      |                      |                      |
| $E_{PTI}$                | 0                 |                      |                      |                      |

481 Number of females in the population:  $n_1 = 1440$ ; number of males in the population:  $n_2 = 1440$ ; From  
 482 Table 1,  $p'_{1i}$ : observed relative frequency of type  $i$  in mating females;  $p'_{2i}$ : observed relative frequency of  
 483 type  $i$  in mating males;  $q'_{ij}$ : observed relative frequency of copulating pair  $i, j$ .

484

#### 485 *4.1 Exploring models*

486 In the analysis performed above we used the information partition for testing if the  
 487 observations can be explained by random mating, in a similar way as we do when using  
 488 the  $I_{PSI}$  statistic for testing sexual isolation (Carvajal-Rodriguez and Rolan-Alvarez,  
 489 2006; Rolán-Alvarez and Caballero, 2000).

490 However, the proposed theoretical framework permits going further than just testing  
 491 random mating. We can rely on the described properties of mutual propensities under

492 sexual selection and isolation, for defining different effects models. If we can define  
493 models from which we can predict the effects, then we can try to fit and infer significant  
494 parameters from the available data.

495 As an example, I have used the software InfoMating (Carvajal-Rodriguez, 2017) to  
496 estimate the mutual mating propensity parameters associated to the data in Table 2. The  
497 software uses the  $J$  information framework to a priori construct (before data) different  
498 effects models, and then compare the fitting of random mating, sexual selection and  
499 sexual isolation models to the data. There are models having sexual selection only in  
500 females, only in males or in both. The models with sexual isolation will have or not  
501 sexual selection depending on the frequencies (the conditions on marginal propensities  
502 for sexual selection are frequency dependent). The most complex model is also  
503 considered. Under this model the mutual mating propensities are estimated by the  $PTIs$   
504 that are indeed the maximum likelihood estimates.

505 I have considered BIC (Schwarz, 1978) and AIC (Akaike, 1973) selection criteria. Both  
506 gave similar results. The best fit model was a two parameter model with sexual isolation  
507 and female sexual selection effects. The model uses two parameters  $a$  and  $b$  to define  
508 the four mating propensity values as  $m_{ZZ} = a$ ,  $m_{ZM} = 1-b$ ,  $m_{MZ} = 1$ ,  $m_{MM} = a+b$ .

509 The obtained estimates under the BIC criterion were  $a = 2.47$  and  $b = 0.64$  which after  
510 normalization, provide the mutual mating propensity estimates as they appear in Table  
511 3.

512 **TABLE 3. Mutual-propensity estimates from multimodel inference.**

|      | Female | Z | M |
|------|--------|---|---|
| Male |        |   |   |

|          |      |      |
|----------|------|------|
| <b>Z</b> | 1.42 | 0.58 |
| <b>M</b> | 0.21 | 1.79 |

513

514 The obtained estimates are almost identical to the corresponding *PTI* values but we have  
515 only needed two parameters instead of three for defining the model. Therefore, the two  
516 parameter model may provide some insight into the biology of the mating relationships.

517 The obtained estimates imply positive assortative mating because the homotype mutual  
518 propensities (main diagonal in Table 3) are higher than the heterotype ones  
519 (antidiagonal,  $m_{ZM}$  and  $m_{MZ}$ ). If we compare the mean homotype versus the mean  
520 heterotype mating propensities, the difference is  $a + b - 1$ . The value 1 is the value under  
521 random mating so, the increase of homotype mating with respect to random mating is  $a$   
522  $+ b$ .

523 Moreover, the chosen model has no male sexual selection effect. This is clear when we  
524 measure the mean effect of changing the male type in the matings. We see that the  
525 effect is 0 i.e.  $(m_{MM} - m_{MZ} + m_{ZM} - m_{ZZ}) / 2 = 0$ . On the contrary, the mean effect of  
526 changing female Z by M is  $b$ .

527 Thus, the deviation from random mating in the data from Table 2 is composed of a  
528 sexual isolation effect captured by the parameter  $a$  plus an effect  $b$  of sexual selection  
529 focused on the M females which may imply that this females are more receptive to  
530 mating in general.

531

532 **5. Female preference and male display models**

533 The example we have considered involves the same trait in female and male. However,  
534 there are several situations where the female preference is for a male display trait  
535 (Pomiankowski and Iwasa, 1998). In this case, the female trait is the exerted preference  
536 and the male trait is the target phenotype. In the preference-display context, the traits  
537 involved are different between sexes so that the crosses cannot be classified in  
538 homotypic versus heterotypic, which prevents the calculation of  $I_{PSI}$  and other similar  
539 indices that are only applicable to mating models in which the female and male  
540 phenotype is the same (similarity/dissimilarity models).

541 The mutual mating propensity framework can easily capture the preference-display  
542 scenario to express the components of mate choice in terms of information.

543 In Table 4 we appreciate three examples of such preference-display models. There are  
544 two types of females which have preference for males displaying phenotypic values  $A$ ,  
545  $B$  or  $C$ . The frequencies for the different phenotypes are equal. The mating propensities  
546 have been defined with only one parameter and three possible values, namely  $a$ ,  $a/2$  or  
547 virtually 0 ( $\epsilon$ ). In the first column the female preference generates a situation of  
548 complete isolation; in the second column the resultant effect of the female preference is  
549 of full intrasexual selection in males and the third column corresponds to a mixed  
550 scenario where both sexual selection and isolation occur with a mixed effect of -24%  
551 than indicates an strong overlap between both effects.

552

553 **TABLE 4. Mating propensity models of female preference for male display traits.**

554 **Two types of females ‘0’ or ‘1’ might have different preferences for males**

555 **presenting distinct values for some secondary trait ( $a = 1$ ,  $a/2$  or  $\epsilon$ ). Females are the**

556 **choosy sex so that the generic model implies only the female acceptance (or**  
 557 **preference) function  $f_1$ .**

| $m_{\text{female},\text{male}}$  | Isolation  | Sexual selection | Mixed           | Generic    |
|----------------------------------|------------|------------------|-----------------|------------|
| $m_{0A}$                         | $a$        | $a$              | $a$             | $f_1(0,A)$ |
| $m_{0B}$                         | $a/2$      | $a/2$            | $\epsilon$      | $f_1(0,B)$ |
| $m_{0C}$                         | $\epsilon$ | $\epsilon$       | $\epsilon$      | $f_1(0,C)$ |
| $m_{1A}$                         | $\epsilon$ | $a$              | $\epsilon$      | $f_1(1,A)$ |
| $m_{1B}$                         | $a/2$      | $a/2$            | $\epsilon$      | $f_1(1,B)$ |
| $m_{1C}$                         | $a$        | $\epsilon$       | $a$             | $f_1(1,C)$ |
| $JZ_{PTI}$                       | 13         | 13               | 26              |            |
| $JZ_{PSI} / JZ_{PTI}$            | 100%       | 0%               | 75%             |            |
| $(JX_{S1} + JY_{S2}) / JZ_{PTI}$ | 0%         | 100% (0% + 100%) | 49% (0% + 100%) |            |
| $ZE_0 / JZ_{PTI}$                | 0%         | 0%               | -24%            |            |

558  $\epsilon$ : represents an infinitesimal value for which the quantity  $\epsilon \log(\epsilon)$  will be zero.

559

560 However, upon inspecting the propensities in the Table 4, the effects (isolation,  
 561 selection, and mixed) of the preference-display scenarios are not so intuitive, which  
 562 stresses the usefulness of the information partition. For example, the column “Mixed”  
 563 can be represented in a two-way table (Table 5).

564

565 **Table 5. Mating preferences involved in the mixed model from Table 4.**

|  | Males | A | B | C |
|--|-------|---|---|---|
|--|-------|---|---|---|

---

| <b>Females</b> |            |            |            |
|----------------|------------|------------|------------|
| 0              | a          | $\epsilon$ | $\epsilon$ |
| 1              | $\epsilon$ | $\epsilon$ | a          |

---

566

567 The pattern in Table 5 is a clear case of isolation that splits females 0 and males A from  
568 females 1 and males C. Recall that a mixed model implies isolation+ sexual selection.

569 The model is mixed because there is strong sexual selection against B males that  
570 virtually do not mate. At this stage, we do not care if this is because A and C have more  
571 vigour than B in the searching for mates, or because females in general do not like B  
572 males. The result is male sexual selection (against B males), so the model is mixed  
573 because the preferences in the model produce both sexual isolation and selection.

574 We can perform a similar exercise with the other models in Table 4 and see, for  
575 example, that the isolation model provokes isolation because females 0 prefer A while  
576 skip C, and vice versa, females 1 skip A and prefer C (both female phenotypes have the  
577 same preference for B).

578 Under uniform frequencies in both sexes, this isolation model does not generate sexual  
579 selection. The marginal propensity of females 0 and 1 is the same,  $m'_{f0} = m'_{f1} = (a + a/2$   
580  $+ \epsilon) / 3$  so there is no sexual selection in females. In males, the marginal propensity of A  
581 and C is  $(a+ \epsilon)/2$  while is  $a/2$  for B males; they are equal except for the addition of the  
582 factor  $\epsilon/2$  which is virtually 0 and therefore there is no detectable effect of sexual  
583 selection.

584

585 *Discussion*

586 The mate choice model defined in (1) is valid for phenotypes and genotypes, and it only  
587 requires the abstract representation of any kind of relative mutual mating propensity.

588 The model in (1) is similar to the model for the mating pattern predicted from  
589 encounter-mating (EM) scenarios when the availability of individuals is not affected by  
590 the matings that have already occurred (equation 19 in Gimelfarb, 1988). The latter  
591 happens in polygamous species, or even with monogamous, when only a small fraction  
592 of individuals of both sexes successfully mate (i.e. the process of the encounter  
593 corresponds to sampling with replacement).

594 On the contrary, when the species are monogamous and the population size is small, the  
595 mating pattern will depend on the kind of pair formation process (Gimelfarb, 1988). In  
596 the latter case, the information framework should still be valid but the equations must be  
597 updated after each mating round. Therefore, the pair formation process without  
598 replacement, would introduce some noise in the obtained mating patterns. The  
599 application of the proposed methodology in such situations is left for future work.

600 At the same time, (1) is analogous to the Wright's selection equation for the change in  
601 gene frequencies so, from the viewpoint of that analogy, the relative propensity would  
602 play the role of fitness referred to each mating couple. By defining the relationship  
603 between observed and expected mating frequencies as a function of relative mating  
604 propensity, the choice is expressed as a potentiality which is also a key characteristic of  
605 fitness (Wagner, 2010).

606 As with the fitness concept, the mate propensity faces two main aspects, namely the  
607 measurement of differences between couples, and the intrinsic causes that provokes the  
608 propensity values. By expressing the equation of change in terms of the choice  
609 information and its components, this work focused in the first aspect.

610 I have connected the cause of mating choice, which is modeled by the abstract concept  
611 of mutual mating propensity, with the different possible outcomes. Notably, the  
612 connection between mate choice and its consequences appears in terms of information.  
613 The general equation ( $J_{PTI}$ ) represents the information gained by mate choice with  
614 respect to random mating. This general information is the sum of the information due to  
615 sexual isolation and sexual selection, plus a mixed effect term that can be computed  
616 separately from the others. The mixed term measures the adjustment of the partition  
617 components with respect to the total mate choice information. In addition, the  
618 information from sexual selection is the sum of the male and female intrasexual  
619 selection information.

620 Although the model has been constructed assuming discrete phenotypes, it is possible to  
621 estimate the Kullback-Leibler divergence for the continuous case (Pérez-Cruz, 2008)  
622 in order to apply a similar mate choice information partition for quantitative traits.

623 The information framework also provides a baseline for defining adequate null  
624 hypotheses for the distinct aspects of the mate choice problem. In fact, the information  
625 terms are mean log-likelihood ratios, so we can apply them for contrasting the different  
626 null hypothesis about random mating, sexual selection, and isolation.

627 Therefore, the statistical test defined as  $nJ$  (total number of matings  $n$ , multiplied by the  
628 Jeffreys' divergence) is similar to a  $G$ -test. In fact, if we note  $G$  for the  $G$ -test with  $nq$   
629 expected counts, and  $G'$  for the  $G$ -test with  $nq'$  expected counts, then  $nJ = (G + G') / 2$ .

630 Indeed, it has been shown that the  $G$ -test  $G$ , is highly correlated (0.99) with the Jeffreys'  
631 statistic (Evren and Tuna, 2012).

632 We can perform the test against random mating by considering a chi-square distribution  
633 with  $KK'-1$  degrees of freedom (Evren and Tuna, 2012; Sokal and Rohlf, 1981), where



634  $K \times K'$  is the number of different mating categories. The intrasexual selection  
635 components correspond to  $K-1$  and  $K' -1$  degrees of freedom for  $K$  female and  $K'$  male  
636 traits respectively. In addition, the sexual isolation component corresponds to  $(K-1)(K' -$   
637  $1)$  degrees of freedom.

638 Of course, we may also use randomization tests if we prefer to rely on the empirical  
639 distribution approach.

640 Therefore, if we want to contrast mate choice for a given trait  $Z$ , we test deviations from  
641 zero information in  $JZ_{PTI}$  and its components. However, if we want to contrast mate  
642 choice in general, we must test deviations from zero information in  $J_{PTI}$  which should be  
643 the same that testing a flat preference function across all trait values (Edward, 2015).

644 In addition to contrasting the null hypothesis of random mating, we may take advantage  
645 of the informational partition of mate choice effects to develop different kind of general  
646 models defined by their effects. This is possible because the developed relationships  
647 expose and clarify useful general properties, such as the requirement of non-  
648 multiplicative mutual propensity functions for obtaining sexual isolation effects and the  
649 connection of the marginal propensities at each sex with sexual selection.

650 As an example of the possible insight that can be gained relying in the informational  
651 framework, I reanalyzed the well-known example of *D. melanogaster* mating data from  
652 (Hollocher et al., 1997) and besides confirming previous results on the components of  
653 sexual isolation and selection effects, I have been able to fit a simple two-parameter  
654 model that explains the data by means of a component of sexual isolation plus a sexual  
655 selection component favoring the mating of the M-type females.

656 In addition to the similarity models in which the same phenotype is involved in both  
657 sexes, the preference-display models are also easily interpreted in terms of information

658 and we have been able of inspecting models of full isolation, full intrasexual selection,  
659 and mixed effect models.

660 We have also seen an example with multiplicative mutual propensity by means of a  
661 simple preference-display model based on the bird sage grouse (*Centrocercus*  
662 *urophasianus*) in which the traits ‘acoustic broadcast’ and ‘display rate’, act  
663 multiplicatively over the preference.

664 To conclude, it is worth mentioning that the concept of mate choice is important in the  
665 evolutionary theory and other disciplines. It has been approached from a diversity of  
666 fields and inference methodologies, which has provoked that the terminology has not  
667 always been very precise. This may have contributed to some confusion in terms of  
668 causes and effects jointly with plenty discussion (Ah-King and Gowaty, 2016; Edward,  
669 2015; Janicke et al., 2016; Roughgarden et al., 2015).

670 Here, I have shown that the mean change in the mating phenotypes can be expressed as  
671 the information gained due to mate choice. Overall, the obtained results lead to the  
672 suggestion that the information interpretation of mate choice is an interesting avenue  
673 that may help to improve the study of the causes as well as the effects of this important  
674 evolutionary phenomenon.

### **Acknowledgement**

I would like to thank Carlos Canchaya and two anonymous reviewers for their valuable comments on the manuscript. This work was supported by Xunta de Galicia (Grupo de Referencia Competitiva, ED431C2016-037), Ministerio de Economía y Competitividad (BFU2013-44635-P and CGL2016-75482-P) and by Fondos FEDER (“Unha maneira de facer Europa”).

675

## 676 **Appendix A. Relative propensity and phenotypes**

677 Let  $T$  the trait that is the target of the choice while  $Z$  is any other trait that can be more  
678 or less related to the choice.

679 We call  $J_{PTI}$  to the change in the number of matings when these matings were classified  
680 by  $T$  (equation 2 in the main text). On the other hand, the change in the number of  
681 matings when they were classified by  $Z$  is  $JZ_{PTI}$ .

682 If we cannot measure directly the values of  $m$  (trait  $T$ ) then we simply compute  $J$  based  
683 on trait  $Z$  and therefore we are really computing

$$684 \quad JZ_{PTI} = \alpha_z J_{PTI}$$

685 The scaling factor  $\alpha_z$  is

$$686 \quad \alpha_z = (\beta(m_z, l_z) \times D_z) / (\beta(m, l) \times D) \text{ if } J_{PTI} > 0; \text{ or } 1 \text{ otherwise.}$$

687 The values  $D_m = V(m) / M$  and  $D_z = V(m_z) / M_z$  are the indexes of dispersion over  $T$  and  $Z$   
688 respectively; the subscript  $z$  indicates that the matings were classified by phenotype  $Z$   
689 instead of by  $T$  (see Appendix C for more details in the scaling formulae).

690 The distinction between  $JZ_{PTI}$  and  $J_{PTI}$  matters because when the information produced  
691 by mate choice is computed as  $JZ_{PTI}$ , a value of zero could mean that *i*)  $cov(m_z, l_z) = 0$   
692 so  $\alpha_z = 0$  i.e. the trait  $Z$  do not covariate with the differential propensities (the mating is  
693 random with regard to  $Z$ ) or, alternatively *ii*)  $J_{PTI} = 0$  meaning that there is no  
694 differential mating propensity at all, i.e. the mating is random independently of the trait  
695 we focused on.

696 Let's see an example of the first situation i.e. there is mate choice but the trait  $Z$  is not  
697 involved in the mate choice process. Thus, assume that some unknown trait  $X$  that is  
698 involved in an assortative mating process exists. There are two phenotypic classes '1'  
699 and '2' so that  $m_{11} = 2, m_{12} = 1, m_{21} = 1, m_{22} = 2$ ; the phenotype frequencies are uniform  
700 in males and females,  $p = 0.5$ , and mean propensity  $M = 1.5$ . This results in  $J_{PTI} = J_{PSI} =$   
701 0.1155.

702 However, when counting the matings, we evaluated a phenotype  $Z$  with classes  $A/B$  that  
703 are independent of the mating choice process. If the trait responsible of the mate choice  
704 is uniformly distributed over the phenotypes  $A/B$  (i.e. half of  $A$  individuals have trait  
705 value '1' and the other half have value '2' and the same is true for  $B$  individuals) then the  
706 expected preference for the phenotype pairs are

$$707 \quad m_{AA} = m_{AB} = m_{BA} = m_{BB} = (m_{11} + m_{12} + m_{21} + m_{22}) / 4 = 1.5 = M = M_z.$$

708 Thus it is clear that the normalized preferences are 1 and  $JZ_{PTI} = 0$ .

709 Consider now a different case in which  $JZ_{PTI} \neq 0$ , this means that the non-random  
710 mating is correlated to some extent with the trait  $Z$ . For example, consider the same  
711 mate choice scenario as above with  $J_{PTI} = J_{PSI} = 0.1155$  but now the phenotype under  
712 study is partially linked to the mate choice so  $m_{AA} = 1.7, m_{AB} = 1.2, m_{BA} = 1.2, m_{BB} =$   
713 1.7.

714 Recall that the frequencies are uniform. If we compute directly the information index  
715 over the phenotypes  $Z$ , we get  $JZ_{PTI} = 0.03$ . The mean propensity for these phenotypes  
716 is  $M_z = 1.45$  and  $cov(m_z, l_z) = 0.0435$ . However,  $M = 1.5$  and  $cov(m, l) = 0.1733$  for the  
717 real mate choice trait ( $T$ ). The scaling is  $\alpha_z = [cov(m_z, l_z) / M_z] / [cov(m, l) / M] = 0.2597$   
718 so  $J_{PTI} = JZ_{PTI} / \alpha_z = 0.03 / 0.2597 = 0.1155$ , as expected.

719 If we have an estimate or a computable proxy for the propensity function  $m$ , as for  
720 example, a measure of distance between female and male traits  $|D|$ , or a model with  
721 Gaussian functions (Carvajal-Rodriguez and Rolán-Alvarez, 2014), then  $JZ_{PTI}$  and  $J_{PTI}$   
722 can be estimated separately. We obtain  $J_{PTI}$  by means of  $J(q', q)$  using the estimated  
723 mating propensities to classify the frequencies, and we still can use the phenotypes  $Z$  to  
724 compute  $JZ_{PTI}$ . The relationship between both measures may give an idea about the  
725 linkage between the phenotypes  $Z$  and the mate choice.

726 Suppose that the estimate of  $J_{PTI}$  is different from zero while  $JZ_{PTI} = 0$ , then mate choice  
727 do exist but it is not linked with the phenotype  $Z$ . An interested researcher could  
728 compare different traits looking for the ones having the best scaling for the information  
729  $J_{PTI}$ , i.e. the one that is more involved in the mate choice. It seems that if we are able of  
730 having good proxies for mating propensity, this could pave the way for testing the  
731 impact of different traits on mate choice.

732 Additionally, we still can compute directly  $\Delta Z = Z' - Z$ , i.e. the difference in phenotype  
733 frequencies between observed and expected by random mating. Therefore, we have two  
734 values,  $\Delta_m Z$  and  $\Delta Z$ , for the change in  $Z$ , the discrepancy between them gives an  
735 estimate of the change in  $Z$  caused by other factors than mating propensity (e.g.  
736 predators) so  $e_z = \Delta Z - \Delta_m Z$ .

737 Thus the total change in mean  $Z$  is

738 
$$\Delta Z = \alpha_z J_{PTI} + e_z$$

## Appendix B

739 The relationship between sexual selection measured within sex and the pair sexual  
740 selection measured by  $PSS$  is

$$741 \quad J_{PSS} = J_{S1} + J_{S2}$$

742 To see this, recall that  $J_{PSS}$  is the sum of products  $\Delta(p_{1i}p_{2j}) \times \log((p'_{1i}p'_{2j}) / (p_{1i}p_{2j}))$ .

743 Then note that

$$744 \quad \log((p'_{1i}p'_{2j}) / (p_{1i}p_{2j})) = \log(p'_{1i} / p_{1i}) + \log(p'_{2j} / p_{2j})$$

745 and that

$$746 \quad \sum_{ij} \Delta(p_{1i}p_{2j}) = \sum_{ij} (p'_{1i}p'_{2j} - p_{1i}p_{2j}) = \sum_i p'_{1i} \sum_j p'_{2j} - \sum_i p_{1i} \sum_j p_{2j} = 0$$

747 because each summation is 1. Then, after some algebraic rearrangement we obtain

$$748 \quad J_{PSS} = \sum_{ij} \Delta(p_{1i}p_{2j}) \log((p'_{1i}p'_{2j}) / (p_{1i}p_{2j})) = \sum_i p'_{1i} \log(p'_{1i} / p_{1i}) - \sum_i p_{1i} \log(p'_{1i} / p_{1i}) +$$

$$749 \quad \sum_j p'_{2j} \log(p'_{2j} / p_{2j}) - \sum_j p_{2j} \log(p'_{2j} / p_{2j}) = J_{S1} + J_{S2}.$$

### Appendix C. Scaling factors

750 We can compute the scaling factors that translate the information between different  
751 phenotypic scales.

752 We have used the notation  $J_{PTI}$ ,  $J_{PSS}$ ,  $J_{PSI}$  and  $E_0$  for indicating the information when  
753 measured from phenotypes that are the choice targets i.e. the phenotypes that the mates  
754 care about in choosing each other. On the other hand, we note  $JZ_{PTI}$ ,  $JZ_{PSS}$ ,  $JZ_{PSI}$  and  
755  $ZE_0$  when the phenotypes may or may not be related with the choice.

756 Therefore, it is interesting to shown how the information changes between one measures  
757 or others. So that

758  $JZ_{PTI} = \alpha_z J_{PTI}$ ;  $JZ_{PSS} = \alpha_{pss} J_{PSS}$ ;  $JX_{S1} = \alpha_x J_{S1}$ ;  $JY_{S2} = \alpha_y J_{S2}$ ;  $ZE_0 = \alpha_E E_0$  and  $JZ_{PSI} = \alpha_z J_{PTI} -$

759  $(\alpha_{pss} J_{PSS} + \alpha_E E_0)$

760 The scalings are as follows.

761  $\alpha_z = [cov(m_z, l_z) / M_z] / [cov(m, l) / M]$  with  $l_z = \log(m_z)$  and  $l = \log(m)$  if  $J_{PTI} > 0$

762 or  $\alpha_z = 1$  otherwise ( $J_{PTI} = 0$ ).

763 However, we can also express  $cov(m_z, l_z) / M_z$  as  $\beta(m_z, l_z) \times D_z$  which is the regression of

764 the propensity under the trait Z over its logarithm multiplied by the index of dispersion.

765 Then if  $D_m = V(m) / M$  and  $D_z = V(m_z) / M_z$  are the indexes of dispersion over the choice

766 and Z traits respectively, we obtain

767  $(cov(m_z, l_z) / M_z) / (cov(m, l) / M) = (\beta(m_z, l_z) \times D_z) / (\beta(m, l) \times D)$

768 Then if if  $J_{PTI} > 0$  define

769  $\alpha_z = (\beta(m_z, l_z) \times D_z) / (\beta(m, l) \times D)$

770 where  $l_z = \log(m_z)$  and  $l = \log(m)$

771 or  $\alpha_z = 1$  if  $J_{PTI} = 0$

772 Similarly,

773  $\alpha_x = [cov(m'_{zf}, l_{zf}) / M_z] / [cov(m'_f, l_f) / M] = (\beta(m'_{zf}, l_{zf}) \times D_{zf}) / (\beta(m'_f, l) \times D_f)$

774 or 1 if  $J_{PS1} = 0$

775 where  $l_{zf} = \log(m'_{zf})$ ,  $D_{zf} = V(m'_{zf}) / M_z$ ,  $l_f = \log(m'_f)$ ,  $D_f = V(m'_f) / M$

776  $\alpha_y = [cov(m'_{zm}, l_{zm}) / M_z] / [cov(m'_m, l_m) / M] = (\beta(m'_{zm}, l_{zm}) \times D_{zm}) / (\beta(m'_m, l) \times D_m)$  or 1 if

777  $J_{PS2} = 0$

778 where  $l_{zm} = \log(m'_{zm})$ ,  $D_{zm} = V(m'_{zm})/M_z$ .

779  $\alpha_{pss} = [\text{cov}(m'_{zf} m'_{zm}, l'_z) / M_z^2] / [\text{cov}(m'_f m'_m, l') / M^2] = (\beta(m'_z, l'_z) \times D'_z) / (\beta(m', l') \times D')$

780 or 1 if  $J_{PSS} = 0$

781 where  $m'_z = m'_{zf} \times m'_{zm}$ ,  $m' = m'_f m'_m$ ,  $D'_z = V(m'_z) / M_z^2$ ,  $l'_z = \log(m'_z)$ ,  $l' = \log(m')$ ,  $D' =$

782  $V(m') / M^2$ .

783  $\alpha_E = [\text{cov}(m'_{zf} m'_{zm}, \log(PSI_z)) / M_z^2] / [\text{cov}(m'_f m'_m, \log(PSI)) / M^2] = (\beta(m'_z, l_{zpsi}) \times D'_z) /$

784  $(\beta(m', l_{psi}) \times D')$  or 1 if  $E_0 = 0$

785 where  $l_{zpsi} = \log(PSI_z)$ ,  $l_{psi} = \log(PSI)$ .

786 Finally

787 if  $J_{PSI} > 0$

788  $\alpha_\delta = \alpha_z$  when  $J_{PSS} = 0$  or in general

$$\alpha_\delta = \frac{\alpha_T J Z_{PSI}}{\alpha_{pss} \alpha_E J Z_{PTI} - \alpha_z (\alpha_E J Z_{PSS} + \alpha_{pss} Z E_0)}$$

789 with  $\alpha_T = \alpha_z \times \alpha_{pss} \times \alpha_E$ ; so that  $J Z_{PSI} = \alpha_\delta J_{PSI}$ .

#### Appendix D. Multiplicative preference example

790 Consider two male traits,  $B/b$  for acoustic broadcast and  $D/d$  for display rate, where in

791 both cases the upper case refers to the higher value of the trait; consider also one female

792 trait  $X$  with a single phenotypic class. The females are the choosers and so we may

793 define multiplicative preferences as appear in Table S1.

794



795 **Table S1. Mating preferences for acoustic broadcast and display rate.**

|                | <b>Males</b> | <b>Bd</b> | <b>BD</b>     | <b>bD</b> | <b>bd</b> |
|----------------|--------------|-----------|---------------|-----------|-----------|
| <b>Females</b> |              |           |               |           |           |
| <i>X</i>       |              | $\alpha$  | $\alpha\beta$ | $\beta$   | 1         |

796

797 The model assumes a single female phenotypic class and so the frequency is 1. Let the  
 798 frequencies of the different male classes be  $p_{Bd}$ ,  $p_{BD}$ ,  $p_{bD}$  and  $p_{bd}$ . Then the mean  
 799 preference is  $M = \alpha p_{Bd} + \alpha\beta p_{BD} + \beta p_{bD} + p_{bd}$ . There is only one female marginal  
 800 preference, that in fact coincides with the mean preference,  $m'_{fX} = M$ . There are four  
 801 male marginal preferences ( $m'_{mBd}$ ,  $m'_{mBD}$ ,  $m'_{mbD}$ ,  $m'_{mbd}$ ) that match the corresponding  
 802 male propensity with the single female phenotype i.e.  $m'_{mBd} = \alpha$ ,  $m'_{mBD} = \alpha\beta$ ,  $m'_{mbD} = \beta$   
 803 and  $m'_{mbd} = 1$ .

804 In (5) we have given an aprioristic expression ( $\delta$ ) of the pair sexual isolation (*PSI*)  
 805 coefficients in terms of the preferences so that  $\delta_{ij} = (m_{ij}/M) / (m'_{fi}m'_{mj}/M^2)$ . Therefore,  
 806  $\delta_{Bd} = (m_{Bd}/M) / (m'_{fX}m'_{mBd}/M^2) = (\alpha/M) / (M\alpha/M^2) = 1$  and similarly for the other  
 807 phenotypes so finally  $\delta_{Bd} = \delta_{BD} = \delta_{bD} = \delta_{bd} = 1$ , which implies no sexual isolation.

On the other hand, the model predicts male sexual selection whenever  $\alpha$  and/or  $\beta \neq 1$ .

## Appendix E

808 *Proposition 1*

809 
$$\sum_{ij} \Delta(p'_{1i}p'_{2j}) \log(PSS_{ij}) = 0$$

810 then

$$811 \quad E_0 = \sum_{ij} (\Delta(p_{1i}p_{2j}) \log(PSSI_{ij}) + \Delta(p'_{1i}p'_{2j}) \log(PSS_{ij})) = \sum_{ij} \Delta(p_{1i}p_{2j}) \log(PSSI_{ij}).$$

812 First, recall that

$$813 \quad \sum_{ij} \Delta(p'_{1i}p'_{2j}) \log(PSS_{ij}) = \sum_{ij} (q'_{ij} - p'_{1i}p'_{2j}) \log(PSS_{ij})$$

814 and also that by definition of  $PSS$

$$815 \quad \log(PSS_{ij}) = \log((p'_{1i}p'_{2j}) / (p_{1i}p_{2j}))$$

816 that can be expressed as

$$817 \quad \log(PSS_{ij}) = \log(p'_{1i} / p_{1i}) + \log(p'_{2j} / p_{2j})$$

818 then by simple substitution and rearranging the terms

$$819 \quad \sum_{ij} \Delta(p'_{1i}p'_{2j}) \log(PSS_{ij}) =$$

$$820 \quad \sum_{ij} (q'_{ij} - p'_{1i}p'_{2j}) \log(PSS_{ij}) = \sum_{ij} q'_{ij} \log(p'_{1i} / p_{1i}) + \sum_{ij} q'_{ij} \log(p'_{2j} / p_{2j}) -$$

$$821 \quad \sum_{ij} (p'_{1i}p'_{2j}) \log(p'_{1i} / p_{1i}) - \sum_{ij} (p'_{1i}p'_{2j}) \log(p'_{2j} / p_{2j})$$

822 Now recall that the  $i$  subscript refers to females and subscript  $j$  to males, then the double

823 summatory is the sum through females and males, thus by reminding that  $\sum_j p'_{2j} = \sum_i p'_{1i}$

824  $= 1$  we note that

$$825 \quad \sum_{ij} (p'_{1i}p'_{2j}) \log(p'_{1i} / p_{1i}) = \sum_i (p'_{1i}) \log(p'_{1i} / p_{1i}) \sum_j p'_{2j} = \sum_i p'_{1i} \log(p'_{1i} / p_{1i})$$

826 and similarly

$$827 \quad \sum_{ij} (p'_{1i}p'_{2j}) \log(p'_{2j} / p_{2j}) = \sum_j p'_{2j} \log(p'_{2j} / p_{2j})$$

828 so we have

$$829 \quad \sum_{ij} \Delta(p'_{1i}p'_{2j}) \log(PSS_{ij}) =$$

$$830 \quad \sum_{ij} q'_{ij} \log(p'_{1i} / p_{1i}) + \sum_{ij} q'_{ij} \log(p'_{2j} / p_{2j}) - \sum_i p'_{1i} \log(p'_{1i} / p_{1i}) - \sum_j p'_{2j} \log(p'_{2j} / p_{2j})$$

831 Now note that

$$832 \quad \sum_{ij} q'_{ij} \log(p'_{1i}/p_{1i}) = \sum_i \log(p'_{1i}/p_{1i}) \sum_j q'_{ij}$$

833 and that for each female  $i$  the sum through males of the observed mating frequencies

834 involving female  $i$  is, by definition,  $p'_{1i}$  i.e.  $\sum_j q'_{ij} = p'_{1i}$  and similarly for each male  $j$  we

835 have  $\sum_i q'_{ij} = p'_{2j}$ . Then

$$836 \quad \sum_{ij} q'_{ij} \log(p'_{1i}/p_{1i}) = \sum_i \log(p'_{1i}/p_{1i}) p'_{1i}$$

837 and

$$838 \quad \sum_{ij} q'_{ij} \log(p'_{2j}/p_{2j}) = \sum_j \log(p'_{2j}/p_{2j}) p'_{2j}$$

839 therefore

$$840 \quad \sum_{ij} \Delta(p'_{1i} p'_{2j}) \log(PSS_{ij}) =$$

$$841 \quad \sum_i \log(p'_{1i}/p_{1i}) p'_{1i} - \sum_i p'_{1i} \log(p'_{1i}/p_{1i}) + \sum_j \log(p'_{2j}/p_{2j}) p'_{2j} - \sum_j p'_{2j} \log(p'_{2j}/p_{2j}) = 0$$

842 and so the proposition is true

$$843 \quad E_0 = \sum_{ij} (\Delta(p_{1i} p_{2j}) \log(PSI_{ij}))$$

844

845 *Proposition 2*

$$846 \quad E_0 = D'_{KL}(w, q' || p')$$

847 where

$$848 \quad p' = p'_1 p'_2$$

$$849 \quad w_{ij} = (PSS_{ij} - 1) / PTI_{ij}$$

850 
$$D'_{\text{KL}}(w, q' \| p') = \sum_{ij} w_{ij} q'_{ij} \log(q'_{ij} / (p'_{1i} p'_{2j}))$$

851 From the model (1) and the partitions (4) and (5) in the main text we know that

852 
$$(p_{1i} p_{2j}) = (p'_{1i} p'_{2j}) / PSS_{ij}$$

853 
$$(p'_{1i} p'_{2j}) = q'_{ij} / PSI_{ij}$$

854 therefore

855 
$$\Delta(p_{1i} p_{2j}) = (p'_{1i} p'_{2j}) - (p_{1i} p_{2j}) = (q'_{ij} / PSI_{ij}) - (q'_{ij} / PTI_{ij}) = q'_{ij} [(1 / PSI_{ij}) - (1 / PTI_{ij})]$$

856 and since  $PTI_{ij} = PSI_{ij} \times PSS_{ij}$  we obtain

857 
$$\Delta(p_{1i} p_{2j}) = q'_{ij} (PSS_{ij} - 1) / PTI_{ij}$$

858 and so

859 
$$E_0 = \sum_{ij} (\Delta(p_{1i} p_{2j}) \log(PST_{ij})) = \sum_{ij} w_{ij} q'_{ij} \log(PST_{ij}) = D'_{\text{KL}}(w, q' \| p')$$

860 which is Kullback–Leibler-like divergence with weights  $w_{ij}$  in the observations  $q'$ .

861

## References

- 862 Ah-King, M., Gowaty, P. A., 2016. A conceptual review of mate choice: stochastic demography,  
863 within-sex phenotypic plasticity, and individual flexibility. *Ecology and Evolution*. 6,  
864 4607-4642.
- 865 Akaike, H., Information theory and an extension of the maximum likelihood principle. In: B. N.  
866 Petrov, F. Csaki, Eds.), *Second International Symposium on Information Theory*,  
867 Budapest: Akademiai Kiado, 1973, pp. 267-281.
- 868 Bergstrom, C. T., Real, L. A., 2000. Toward a theory of mutual mate choice: Lessons from two-  
869 sided matching. *Evolutionary Ecology Research*. 493-508.
- 870 Carvajal-Rodriguez, A., *InfoMating*. 2017, pp. Model selection and multimodel inference from  
871 mating frequency data to study sexual selection and sexual isolation effects.

- 872 Carvajal-Rodriguez, A., Rolan-Alvarez, E., 2006. JMATING: a software for the analysis of sexual  
873 selection and sexual isolation effects from mating frequency data. *BMC Evol Biol.* 6, 40.
- 874 Carvajal-Rodriguez, A., Rolán-Alvarez, E., 2014. A comparative study of Gaussian mating  
875 preference functions: a key element of sympatric speciation models. *Biological Journal*  
876 *of the Linnean Society.* 113, 642-657.
- 877 Dall, S. R. X., et al., 2005. Information and its use by animals in evolutionary ecology. *Trends in*  
878 *Ecology & Evolution.* 20, 187-193.
- 879 Darwin, C., 1871. *The descent of man, and selection in relation to sex.* Murray.
- 880 Edward, D. A., 2015. The description of mate choice. *Behavioral Ecology.* 26, 301-310.
- 881 Evren, A., Tuna, E., 2012. On some properties of goodness of fit measures based on statistical  
882 entropy. *International Journal of Research and Reviews in Applied Sciences.* 13, 192-  
883 205.
- 884 Frank, S. A., 2009. Natural selection maximizes Fisher information. *J Evol Biol.* 22, 231-44.
- 885 Frank, S. A., 2012a. Natural selection. IV. The Price equation. *J Evol Biol.* 25, 1002-19.
- 886 Frank, S. A., 2012b. Natural selection. V. How to read the fundamental equations of  
887 evolutionary change in terms of information theory. *J Evol Biol.* 25, 2377-96.
- 888 Frank, S. A., 2013. Natural selection. VI. Partitioning the information in fitness and characters  
889 by path analysis. *Journal of Evolutionary Biology.* 26, 457-471.
- 890 Gavrillets, S., 2004. *Fitness landscapes and the origin of species.* Princeton University Press,  
891 Princeton, N.J.
- 892 Gibson, R. M., 1996. Female choice in sage grouse: the roles of attraction and active  
893 comparison. *Behavioral Ecology and Sociobiology.* 39, 55-59.
- 894 Gimelfarb, A., 1988. Processes of Pair Formation Leading to Assortative Mating in Biological  
895 Populations: Encounter-Mating Model. *The American Naturalist.* 131, 865-884.
- 896 Hollocher, H., et al., 1997. Incipient Speciation by Sexual Isolation in *Drosophila melanogaster*:  
897 Variation in Mating Preference and Correlation Between Sexes. *Evolution.* 51, 1175-  
898 1181.
- 899 Hughes, A. L., 2015. Sexual Selection and Mate Choice: Insights from Neutralist Perspectives.  
900 *Evolutionary Biology.* 42, 366-378.
- 901 Janicke, T., et al., 2016. Darwinian sex roles confirmed across the animal kingdom. *Science*  
902 *Advances.* 2.
- 903 Kirkpatrick, M., 1982. Sexual selection and the evolution of female choice. *Evolution.* 1-12.
- 904 Kuijper, B., et al., 2012. A guide to sexual selection theory. *Annual Review of Ecology,*  
905 *Evolution, and Systematics.* 43, 287-311.
- 906 Lande, R., 1981. Models of speciation by sexual selection on polygenic traits. *Proceedings*  
907 *National Academy of Sciences, USA.* 78, 3721-3725.
- 908 Pérez-Cruz, F., Kullback-Leibler divergence estimation of continuous distributions. 2008 IEEE  
909 international symposium on information theory. IEEE, 2008, pp. 1666-1670.
- 910 Pomiankowski, A., Iwasa, Y., 1998. Runaway ornament diversity caused by Fisherian sexual  
911 selection. *Proceedings of the National Academy of Sciences of the United States of*  
912 *America.* 95, 5106-5111.
- 913 Price, G. R., 1972. Extension of covariance selection mathematics. *Annals of human genetics.*  
914 35, 485-490.
- 915 Prum, R. O., 2010. The Lande-Kirkpatrick mechanism is the null model of evolution by  
916 intersexual selection: implications for meaning, honesty, and design in intersexual  
917 signals. *Evolution.* 64, 3085-3100.
- 918 Roff, D. A., Fairbairn, D. J., 2014. The evolution of phenotypes and genetic parameters under  
919 preferential mating. *Ecology and Evolution.* 4, 2759-2776.
- 920 Rolán-Alvarez, E., Caballero, A., 2000. Estimating sexual selection and sexual isolation effects  
921 from mating frequencies. *Evolution.* 54, 30-6.
- 922 Rosenthal, G. G., 2017. *Mate choice: the evolution of sexual decision making from microbes to*  
923 *humans.* Princeton University Press.

- 924 Roughgarden, J., et al., 2015. Sexual selection studies: a NESCent catalyst meeting. PeerJ  
925 PrePrints 3:e680v3.
- 926 Schwarz, G., 1978. Estimating the dimension of a model. The Annals of Statistics. 6, 461-464.
- 927 Servedio, M. R., et al., 2011. Magic traits in speciation: 'magic' but not rare? Trends in Ecology  
928 & Evolution. 26, 389-397.
- 929 Sokal, R. R., Rohlf, F. J., 1981. Biometry. W. H. Freeman and Co., New York.
- 930 Wagner, G. P., 2010. The measurement theory of fitness. Evolution. 64, 1358-1376.
